# Supplementary material for: A site-level comparison of lysimeter and eddy covariance flux measurements of evapotranspiration
Source: Copernicus journal article supplement (doi:10.5194/hess-21-1809-2017), 2017-03-28
Supplement: Supplementary file 1 [file hess-21-1809-2017-supplement.pdf]

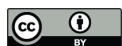

## *Supplement of*

# **A site-level comparison of lysimeter and eddy covariance flux measurements of evapotranspiration**

**Martin Hirschi et al.**

*Correspondence to:* Martin Hirschi ([martin.hirschi@env.ethz.ch](mailto:martin.hirschi@env.ethz.ch)) and Sonia I. Seneviratne ([sonia.seneviratne@env.ethz.ch](mailto:sonia.seneviratne@env.ethz.ch))

The copyright of individual parts of the supplement might differ from the CC-BY 3.0 licence.

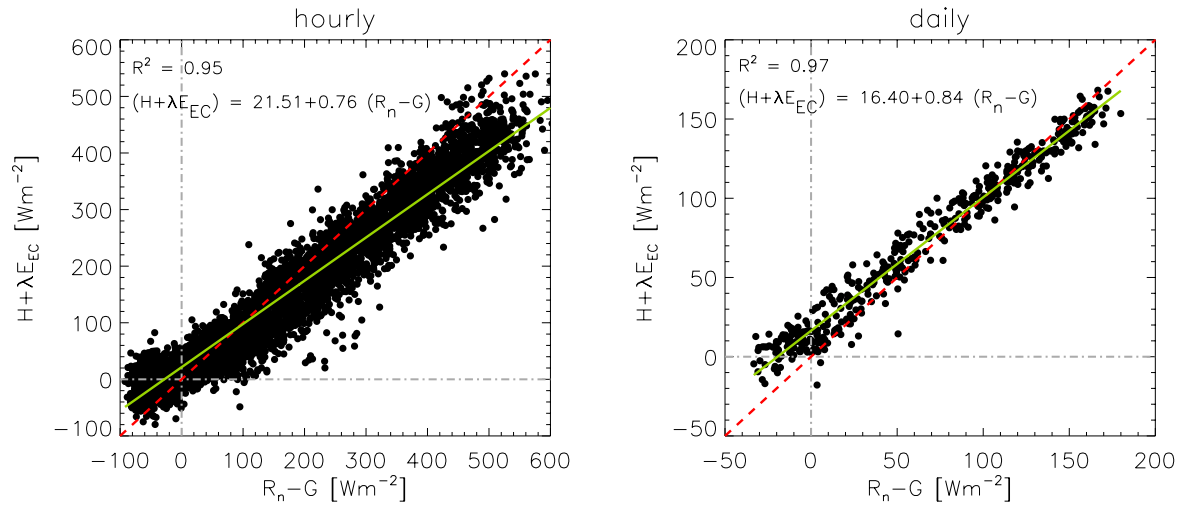

**Supplementary Figure 1: Energy balance closure as evaluated from the ordinary least squares regression based on (left) hourly data and (right) daily data. Only days where maximally five of the hourly values were gapfilled are considered, which leaves 462 days of valid EC observations. The dashed red line indicates the 1:1 line, the green line the regression line.**

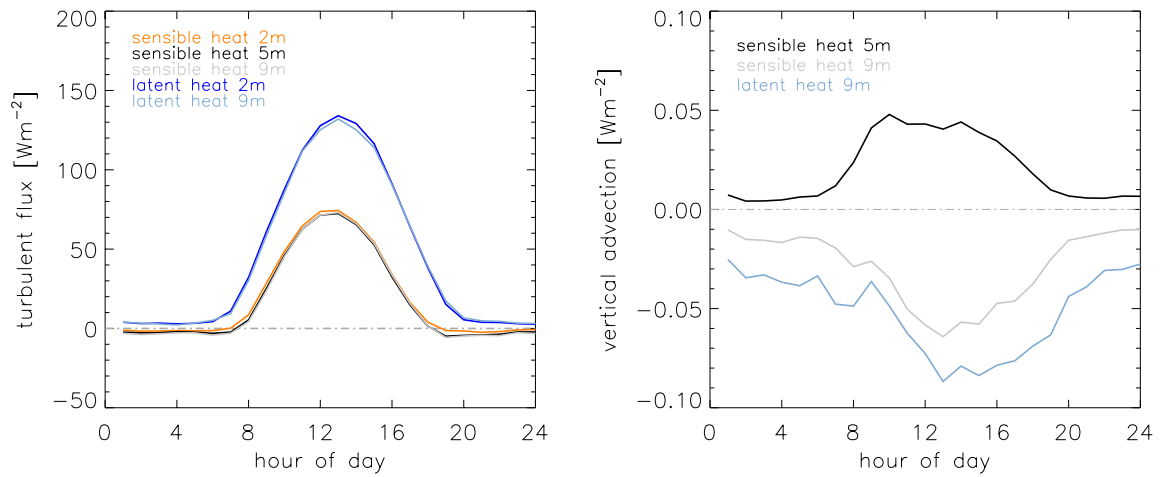

**Supplementary Figure 2: (left) Mean daily cycles of the turbulent fluxes at the different measurement levels and (right) vertical advection at these levels.**

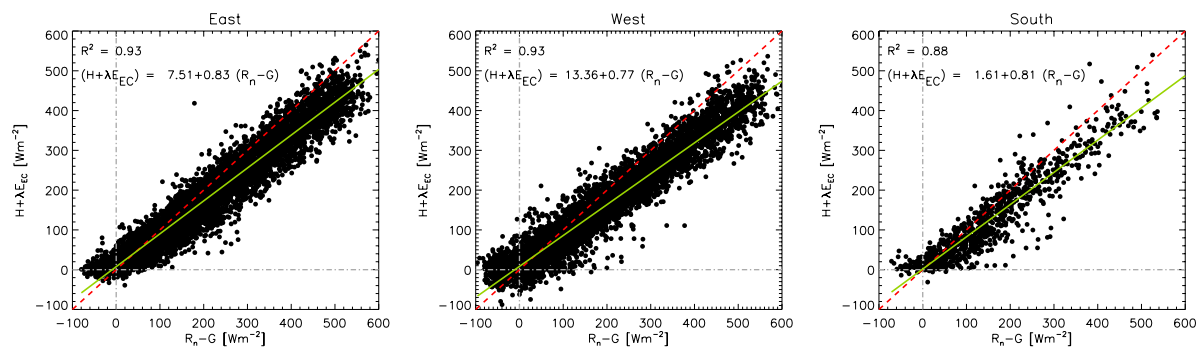

**Supplementary Figure 3: Energy balance closure as evaluated from the ordinary least squares regression between the daytime hourly estimates of the turbulent fluxes against the available energy, separated by the three 90°-wind sectors. (left) Regression based on hours with wind from sector east, (middle) from sector west and (right) from sector south. The dashed red line within each panel indicates the 1:1 line, the green line the regression line.**

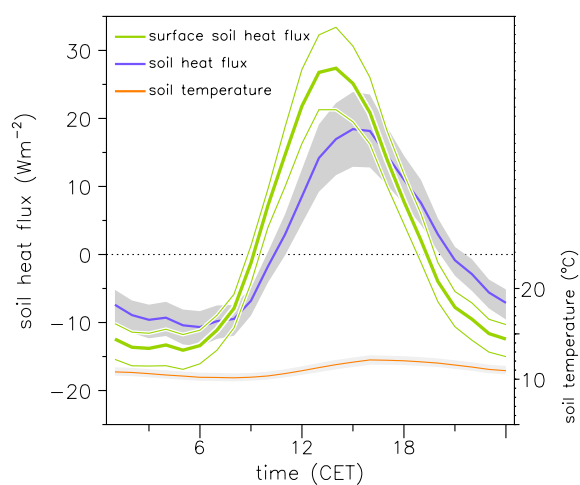

**Supplementary Figure 4: Daily cycles of surface (green lines) and 5-cm (purple) soil heat fluxes, as well as of soil temperature (5 cm depth, orange). For the latter two, solid lines present the data based on the averages of the three heat-flux plates and the three soil temperature sensors respectively, while the range is based on the data from the three individual sensor locations (and displays the minimum and maximum values respectively). For the surface soil heat flux, the estimate calculated from the averaged heat-flux plates and temperature sensors is displayed (thick line), along with a minimum and maximum estimate based on the individual sensor locations (thin lines).**

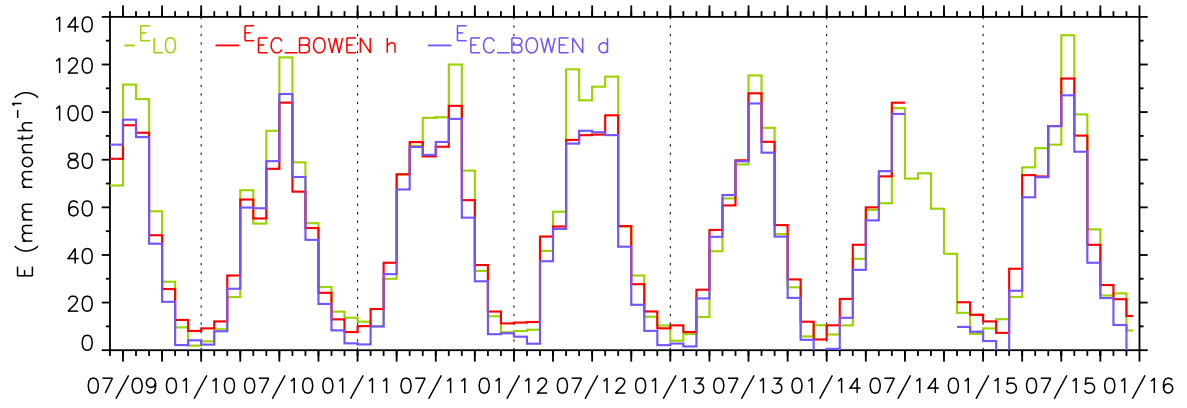

**Supplementary Figure 5: Monthly values of the different evapotranspiration estimates for the time period June 2009 to December 2015.  $E_{L0}$  denotes lysimeter evapotranspiration with values set to zero during hours with rain,  $E_{EC\_BOWEN}$  EC-based evapotranspiration force-closed on hourly ( $E_{EC\_BOWEN\ h}$ ) and daily ( $E_{EC\_BOWEN\ d}$ ) time scale according to the Bowen ratio.**

Supplementary Table 1: Hourly data based statistics ( $R^2$ , RMSD, relative bias (i.e.,  $\frac{E_{EC\_BOWEN} - E_{L0}}{E_{L0}}$ ), number of data) comparing EC ( $E_{EC\_BOWEN}$ ) with lysimeter based evapotranspiration ( $E_{L0}$ ) for different wind directions (i.e., sectors east, west, south and all together) vs. high and low wind speeds (i.e., greater and lower-equal than the median wind speed). Statistics are based on measured values only (i.e., excluding gap-filled data) and masked for precipitation. Units of RMSD in mm,  $R^2$  and relative bias as fractions.

|       | high wind speed |       |           |        | low wind speed |       |           |        |
|-------|-----------------|-------|-----------|--------|----------------|-------|-----------|--------|
|       | $R^2$           | RMSD  | Rel. Bias | Number | $R^2$          | RMSD  | Rel. Bias | Number |
| East  | 0.79            | 0.090 | -0.024    | 3707   | 0.81           | 0.067 | -0.071    | 4777   |
| West  | 0.77            | 0.081 | 0.041     | 9435   | 0.71           | 0.040 | -0.271    | 10176  |
| South | 0.76            | 0.017 | 0.138     | 132    | 0.69           | 0.077 | 0.187     | 1004   |
| All   | 0.78            | 0.084 | 0.016     | 13274  | 0.79           | 0.052 | -0.112    | 15957  |

Supplementary Table 2: As Supplementary Table 1, but for different times of the day (i.e., all-day, daytime and nighttime) vs. high and low water vapor pressure deficits (i.e., greater and lower-equal than the median vapor pressure deficit).

|       | high vapor pressure deficit |       |           |        | low vapor pressure deficit |       |           |        |
|-------|-----------------------------|-------|-----------|--------|----------------------------|-------|-----------|--------|
|       | $R^2$                       | RMSD  | Rel. Bias | Number | $R^2$                      | RMSD  | Rel. Bias | Number |
| All   | 0.76                        | 0.088 | -0.023    | 14967  | 0.28                       | 0.037 | -0.086    | 14968  |
| Day   | 0.67                        | 0.107 | -0.037    | 8043   | 0.53                       | 0.063 | 0.147     | 8044   |
| Night | 0.06                        | 0.031 | -0.247    | 6922   | 0.00                       | 0.027 | -0.568    | 6925   |

Supplementary Table 3: As Supplementary Table 1, but for different times of the day (i.e., all-day, daytime and nighttime) vs. wind from different directions and without RMSD.

|       | All   |           |        | East  |           |        | West  |           |        | South |           |        |
|-------|-------|-----------|--------|-------|-----------|--------|-------|-----------|--------|-------|-----------|--------|
|       | $R^2$ | Rel. Bias | Number |
| All   | 0.80  | -0.029    | 30002  | 0.81  | -0.045    | 8602   | 0.78  | -0.031    | 20242  | 0.71  | 0.175     | 1158   |
| Day   | 0.75  | -0.001    | 16154  | 0.77  | -0.035    | 6495   | 0.74  | 0.015     | 8735   | 0.68  | 0.192     | 924    |
| Night | 0.04  | -0.374    | 13847  | 0.03  | -0.444    | 2107   | 0.04  | -0.359    | 11506  | 0.00  | -0.573    | 234    |
